# Supplementary material for: IL-4Rα signaling by CD8α+ dendritic cells contributes to cerebral malaria by enhancing inflammatory, Th1, and cytotoxic CD8+ T cell responses
Source: PubMed Central journal article supplement — J Biol Chem. 2021 Mar 30;296:100615. doi: 10.1016/j.jbc.2021.100615 (PMC8100064; doi:10.1016/j.jbc.2021.100615), 2021-03-30
Supplement: mmc1.pdf [file mmc1.pdf]

## Supporting information

### **IL-4R $\alpha$ signaling by CD8 $\alpha^+$ dendritic cells contributes to cerebral malaria by enhancing inflammatory, Th1, and cytotoxic CD8 $^+$ T cell responses**

**Xianzhu Wu<sup>1</sup>, Frank Brombacher<sup>2</sup>, Zissis C. Chronos<sup>3</sup>, Christopher C. Norbury<sup>4,‡</sup>, and D. Channe Gowda<sup>4,‡</sup>**

<sup>1</sup>Department of Microbiology<sup>1</sup>Department of Biochemistry and Molecular Biology, The Pennsylvania State University College of Medicine, Hershey, PA 17033

<sup>2</sup>International Centre for Genetic Engineering and Biotechnology (ICGEB), Cape Town, Component & Division of Immunology, Faculty of Health Science, University of Cape Town, South Africa

<sup>3</sup>Department of Pediatrics, The Pennsylvania State University College of Medicine, Hershey, PA 17033

<sup>4</sup>Department of Microbiology and Immunology, The Pennsylvania State University College of Medicine, Hershey, PA 17033

<sup>‡</sup>These authors contributed equally to this work.

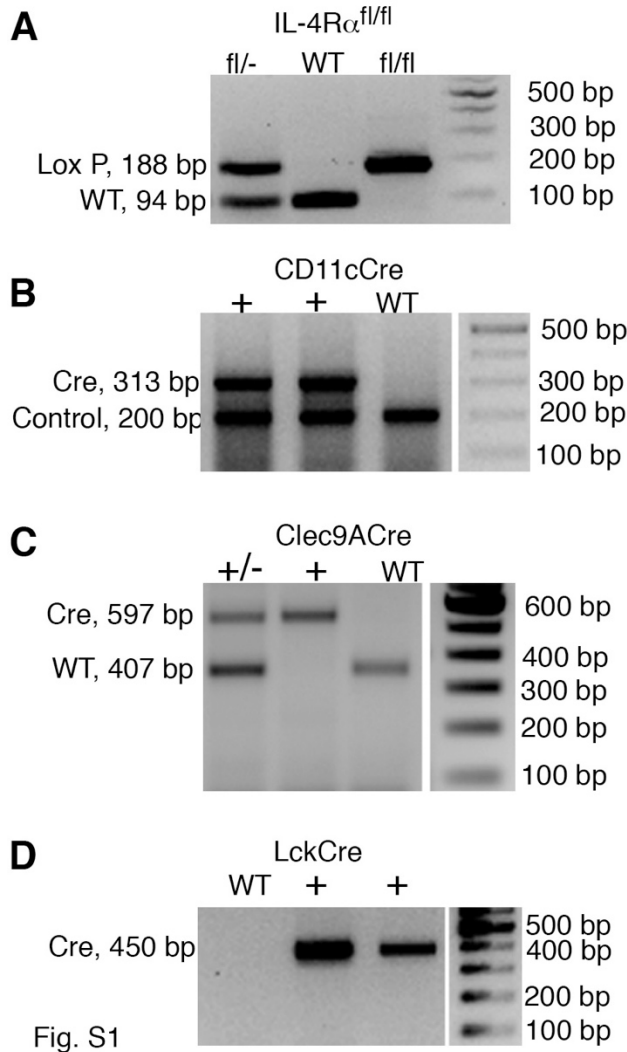

**Figure S1: Conditional knockout of *Il-4ra* generated mice having cell-specific deletion of *Il-4ra*.** *A-D*, IL-4R $\alpha^{fl/fl}$  mice were crossed with CD11cCre, Clec9ACre or LckCre mice and the resulting mice homozygous for loxP (IL-4R $\alpha^{fl/fl}$ ; *A*) and positive for Cre, respectively, in CD11cCre.IL-4R $\alpha^{fl/fl}$  mice (*B*), Clec9ACre.IL-4R $\alpha^{fl/fl}$  mice (*C*) or LckCre.IL-4R $\alpha^{fl/fl}$  mice (*D*) were selected by genotyping. The size markers shown in panels *B-D* are also from the respective same gel.
